# Supplementary material
Source: PubMed Central journal article supplement (PMC2663763)
Supplement: pp.108.133249_1.pdf [file pp.108.133249_1.pdf]

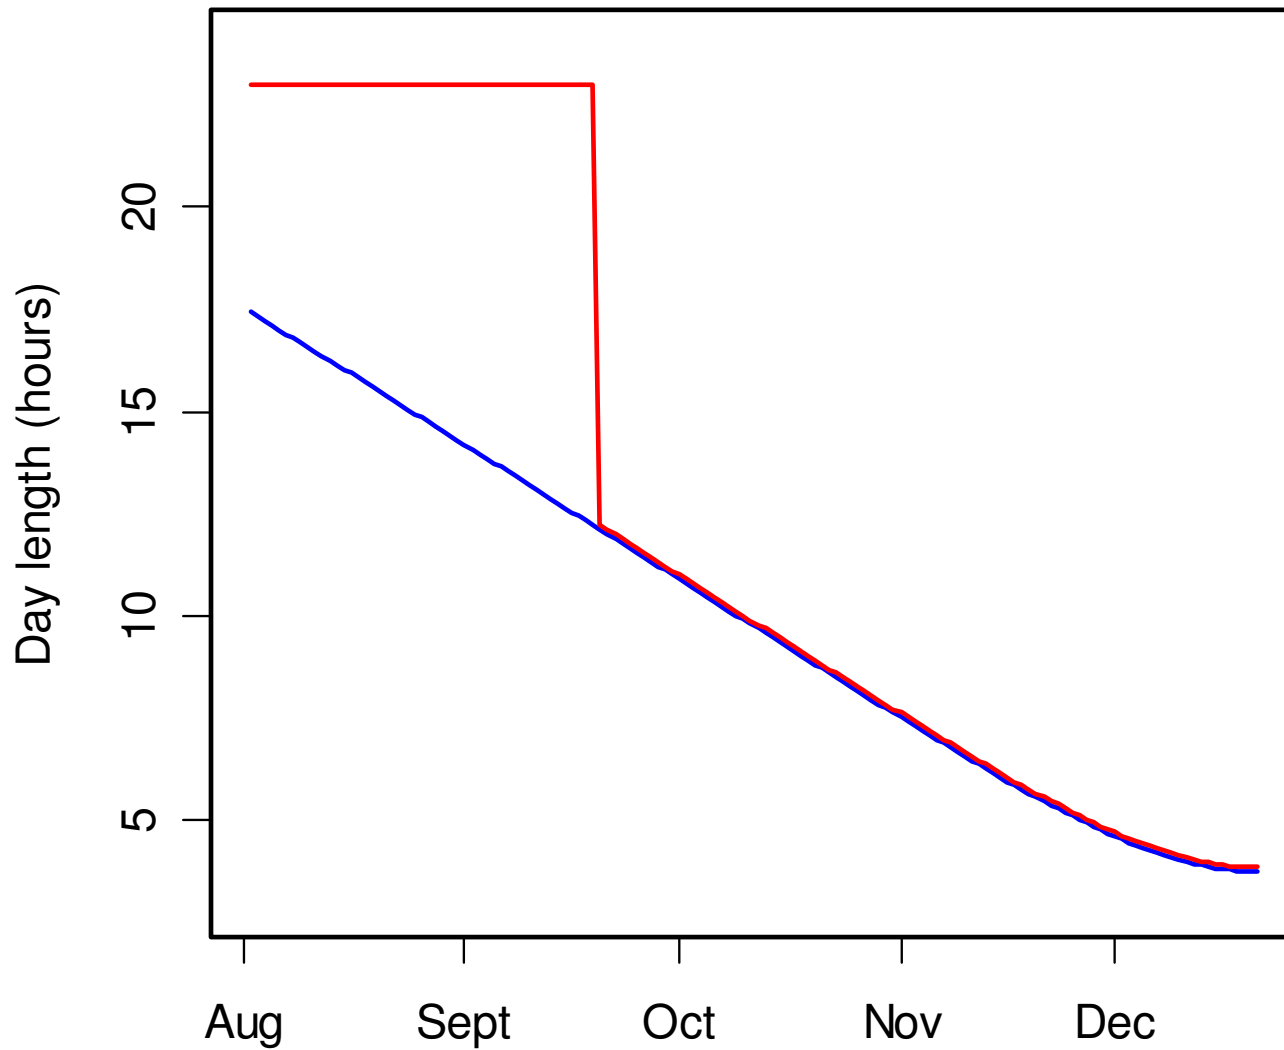

**Supplementary figure 1:** Natural (blue line, 2006) and controlled (red line, 2005) photoperiods in greenhouse experiments
