# Supplementary material
Source: PubMed Central journal article supplement (PMC2663763)
Supplement: pp.108.133249_2.pdf [file pp.108.133249_2.pdf]

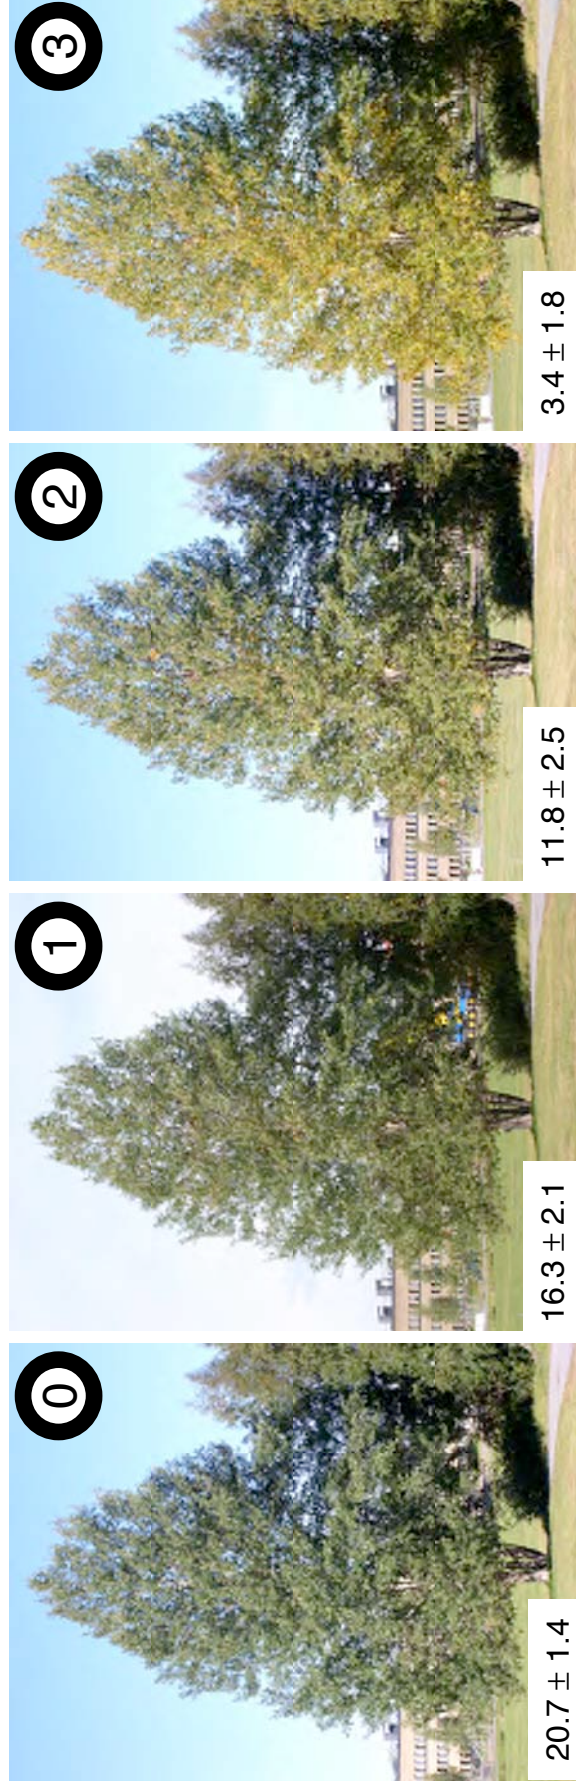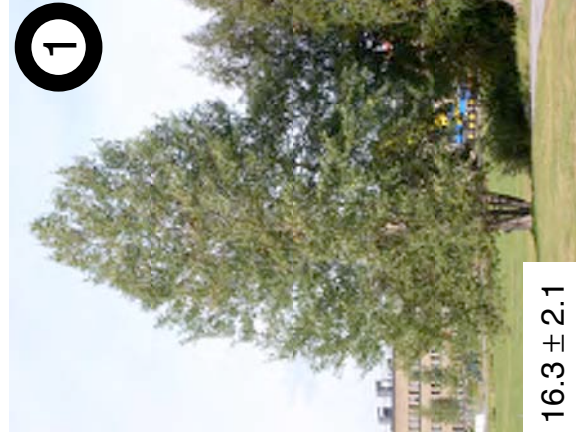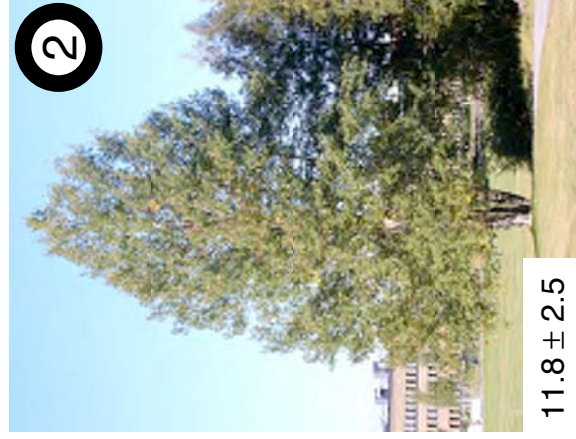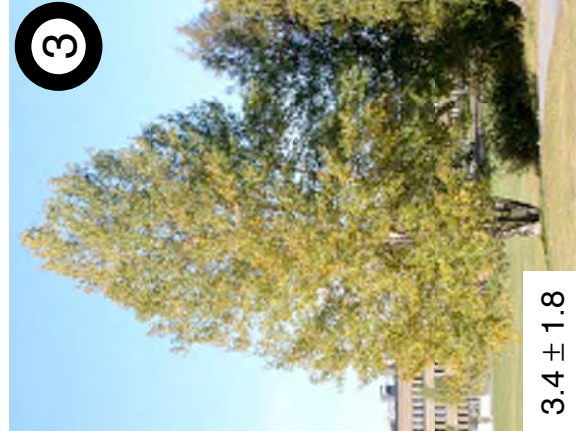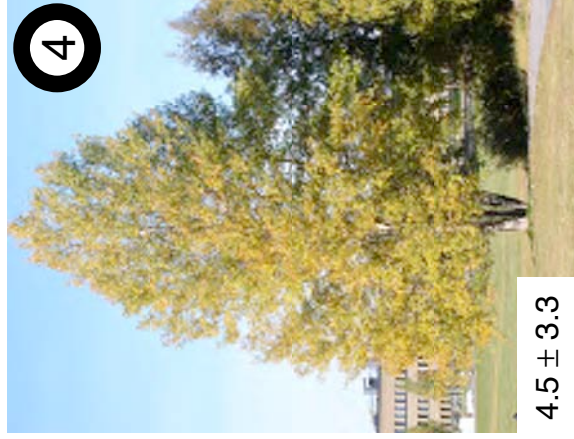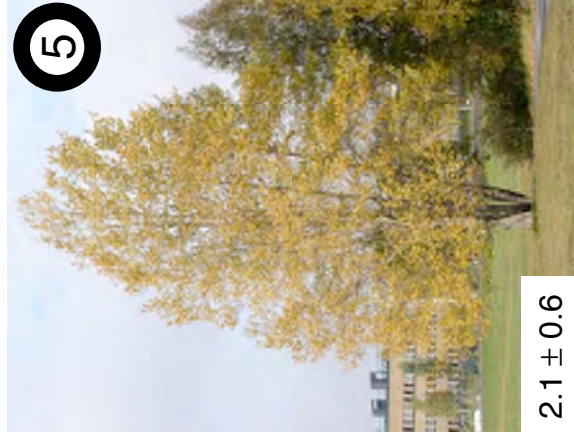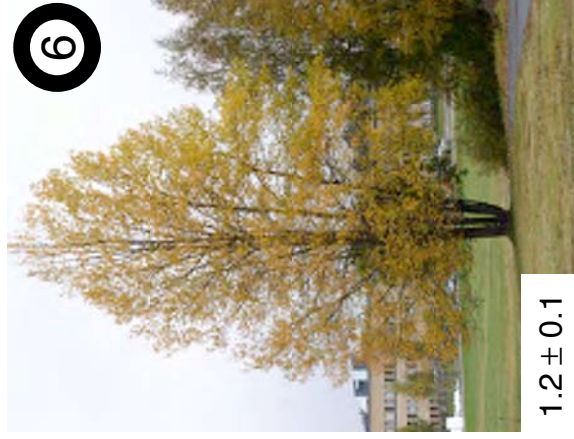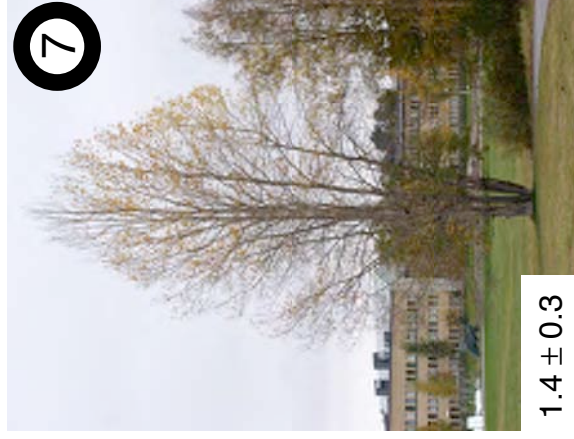

**Supplementary figure 2:** Senescence score card based on pictures from tree 201 shot in autumn 2005. Scores: 0, uniformly green (Sept. 5); 1, more dark green than pale green (Sept. 11); 2, more pale green leaves than dark green (Sept. 17); 3, more green than yellow (Sept. 21); 4, more yellow than green (Sept. 23); 5, only yellow (Sept. 27); 6, mainly gold or brown (Sept. 28); 7, more than 90% abscission (Oct. 2). Relative chlorophyll content indexes (means  $\pm$  SD of five randomly selected leaves) are indicated on the bottom left of the pictures.
