# Supplementary material
Source: PubMed Central journal article supplement (PMC2663763)
Supplement: pp.108.133249_3.pdf [file pp.108.133249_3.pdf]

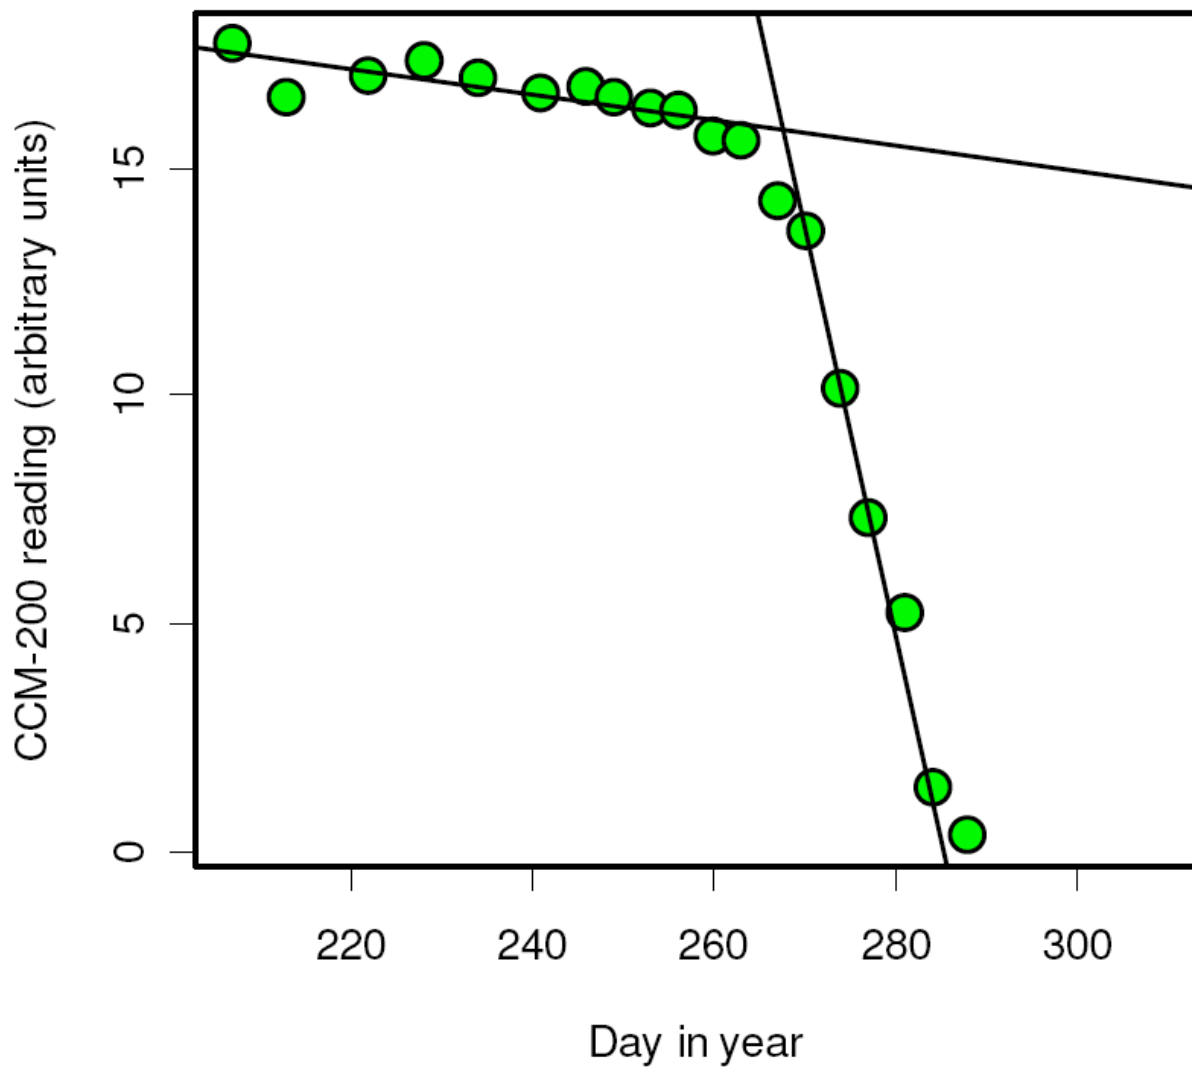

**Supplementary figure 3:** Illustrative measurements of chlorophyll degradation in a tree in the greenhouse in autumn 2006. The two regression lines were used to determine the date of the onset and the rate of senescence as describe in *Material and methods*.
